# Supplementary material for: Reductive O-alkylation of methanol by ketones using a heterogeneous palladium catalyst under continuous flow conditions
Source: Royal Society of Chemistry journal article supplement (doi:10.1039/d4nj03663h), 2024-12-12

## **Reductive *O*-alkylation of methanol by ketones using heterogeneous palladium catalyst under continuous flow conditions**

Xinxin Han<sup>1,2</sup>, Remi Nguyen<sup>2</sup>, Weiyi Ouyang<sup>1,3,\*</sup>, Mingyou Hu<sup>1</sup>, Christophe Len<sup>1,2,\*</sup>

<sup>1</sup> *Xi'an Jiaotong University, School of Chemistry, 28 Xianning West Road, Xi'an 710049, China*

<sup>2</sup> *Chimie ParisTech, PSL Research University, CNRS, Institute of Chemistry for Life and Health Sciences, F-75005 Paris, France*

<sup>3</sup> *Xi'an Biomass Green Catalysis and Advanced Valorization International Science and Technology Cooperation Base, 28 Xianning West Road, Xi'an 710049, China*

Email: [christophe.len@chimieparistech.psl.eu](mailto:christophe.len@chimieparistech.psl.eu) (Christophe Len) ; [weiyi.ouyang@xjtu.edu.cn](mailto:weiyi.ouyang@xjtu.edu.cn)  
(Weiyi Ouyang)

# $^1\text{H}$ and $^{13}\text{C}$ NMR of compound **2a**

k0208xh.5.fid  
xh-c60me

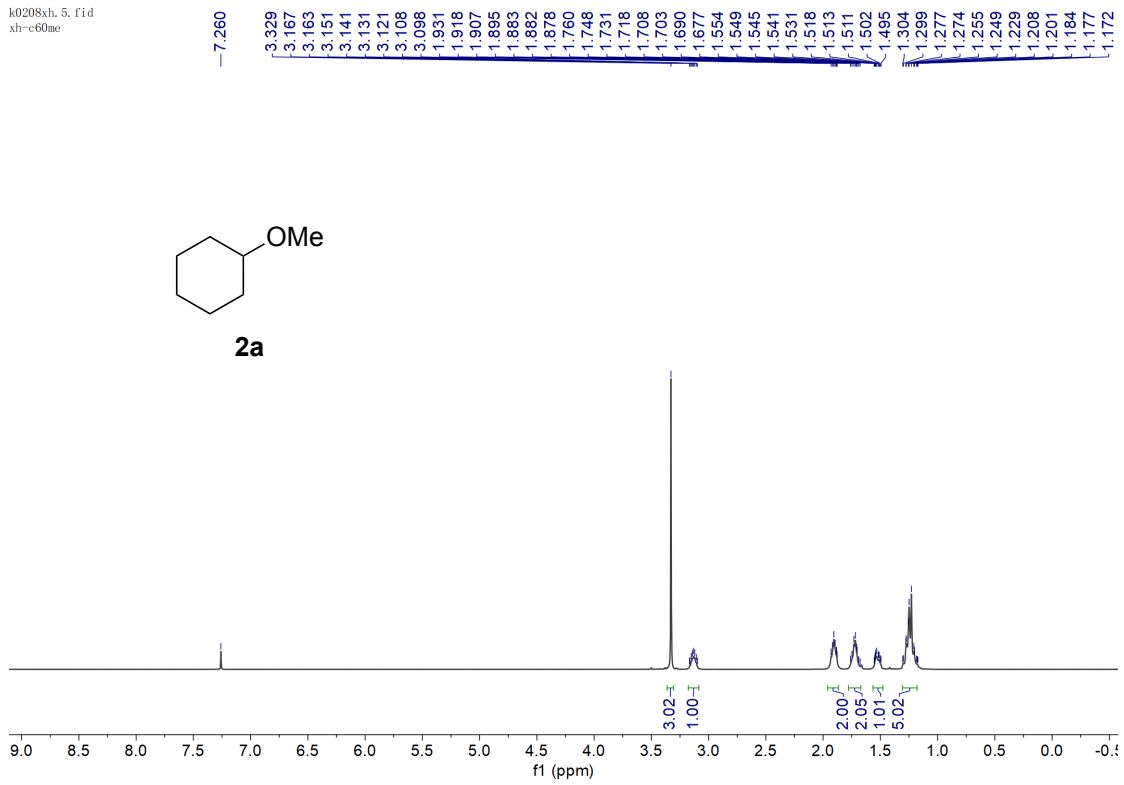

k0208xh.3.fid  
xh-c60me

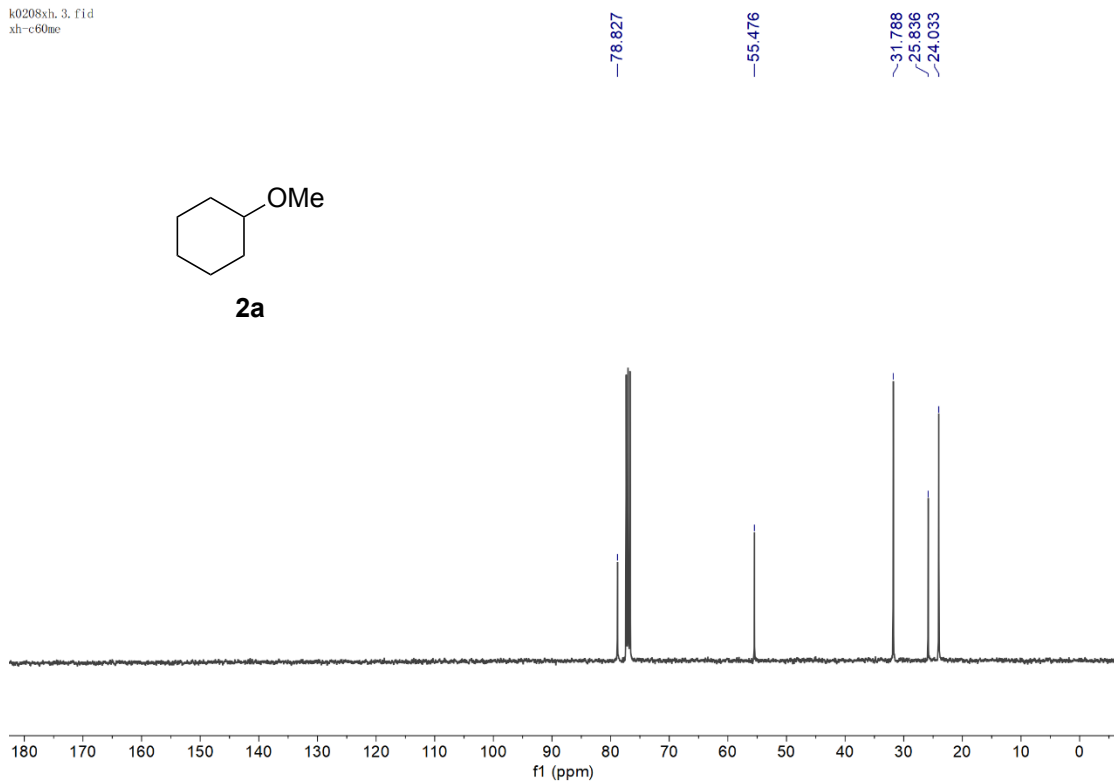

# $^1\text{H}$ and $^{13}\text{C}$ NMR of compound **2b**

7.260  
3.871  
3.808  
3.803  
3.796  
3.787  
3.780  
3.773  
3.766  
3.269  
1.732  
1.730  
1.723  
1.717  
1.715  
1.706  
1.703  
1.698  
1.689  
1.688  
1.680  
1.673  
1.671  
1.666  
1.664  
1.660  
1.655  
1.651  
1.649  
1.646  
1.641  
1.637  
1.634  
1.628  
1.624  
1.619  
1.615  
1.614  
1.610  
1.553  
1.550  
1.547  
1.540  
1.535  
1.532  
1.529  
1.526  
1.524  
1.521  
1.519  
1.516  
1.512  
1.505  
1.501  
1.496  
1.491  
1.488  
1.485

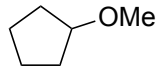

**2b**

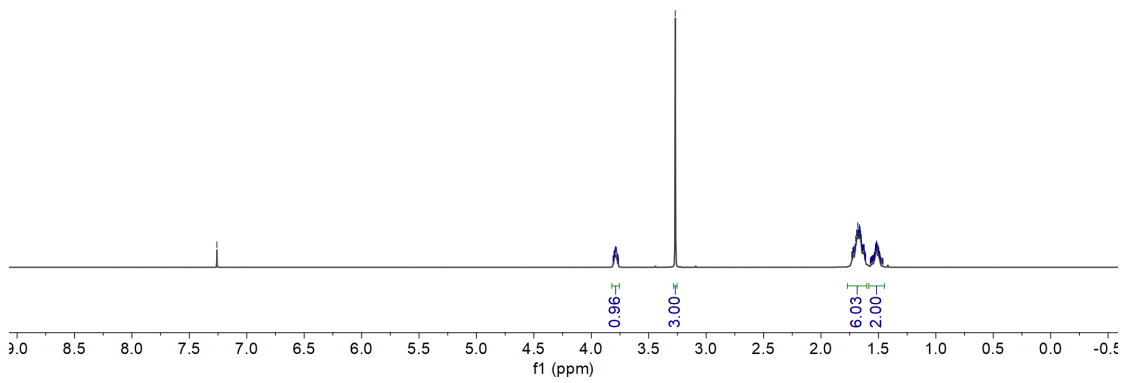

k0707xh.18.fid  
xh-a1r-sp-58

-82.961

-56.325

-31.947

-23.533

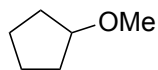

**2b**

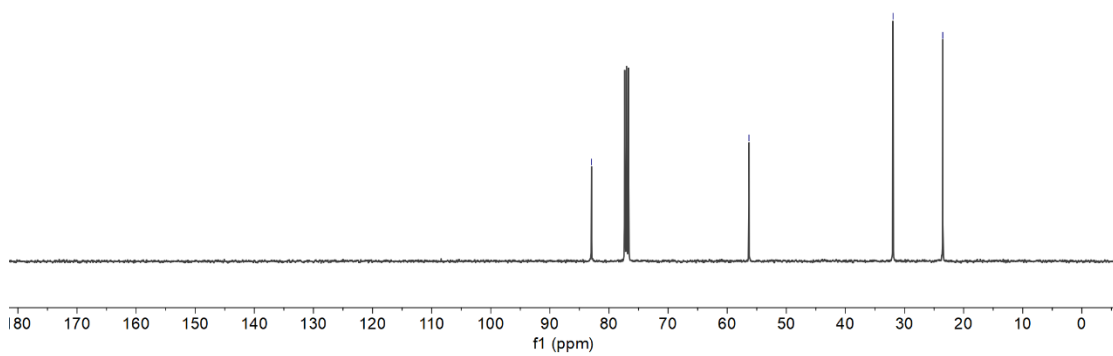

# $^1\text{H}$ and $^{13}\text{C}$ NMR of compound **2d**

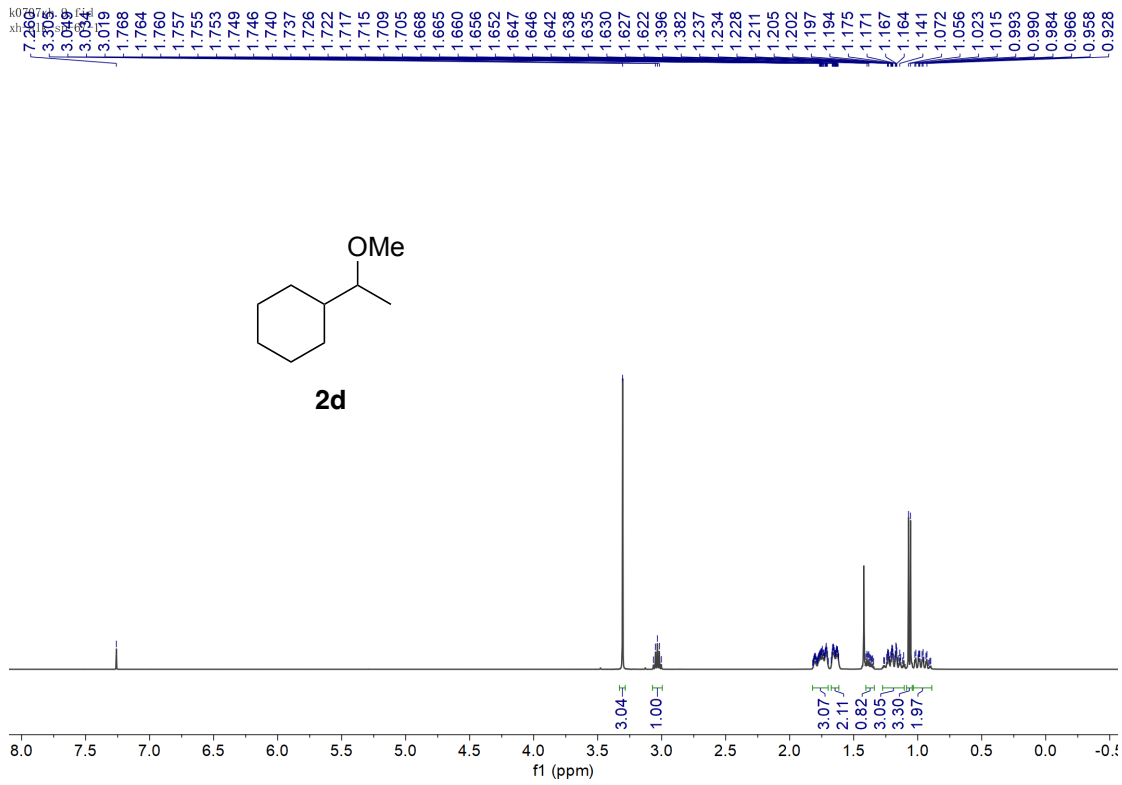

k0707xh.14.fid  
xh-a1r-67-sp

-81.288

-56.454

-43.052

29.057

28.151

26.915

26.686

26.322

-15.600

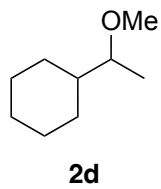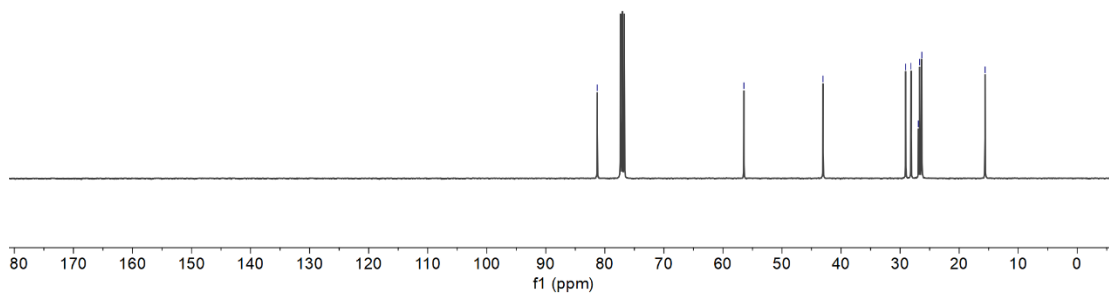

# $^1\text{H}$ and $^{13}\text{C}$ NMR of compound **2e**

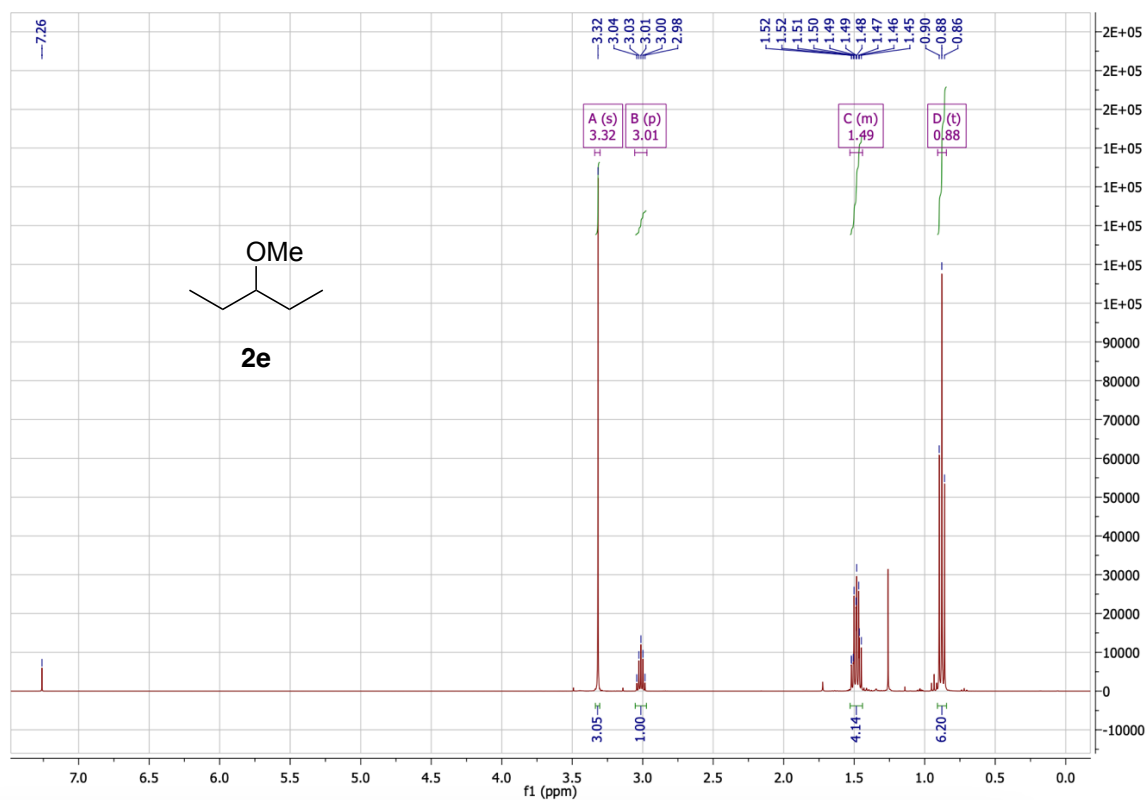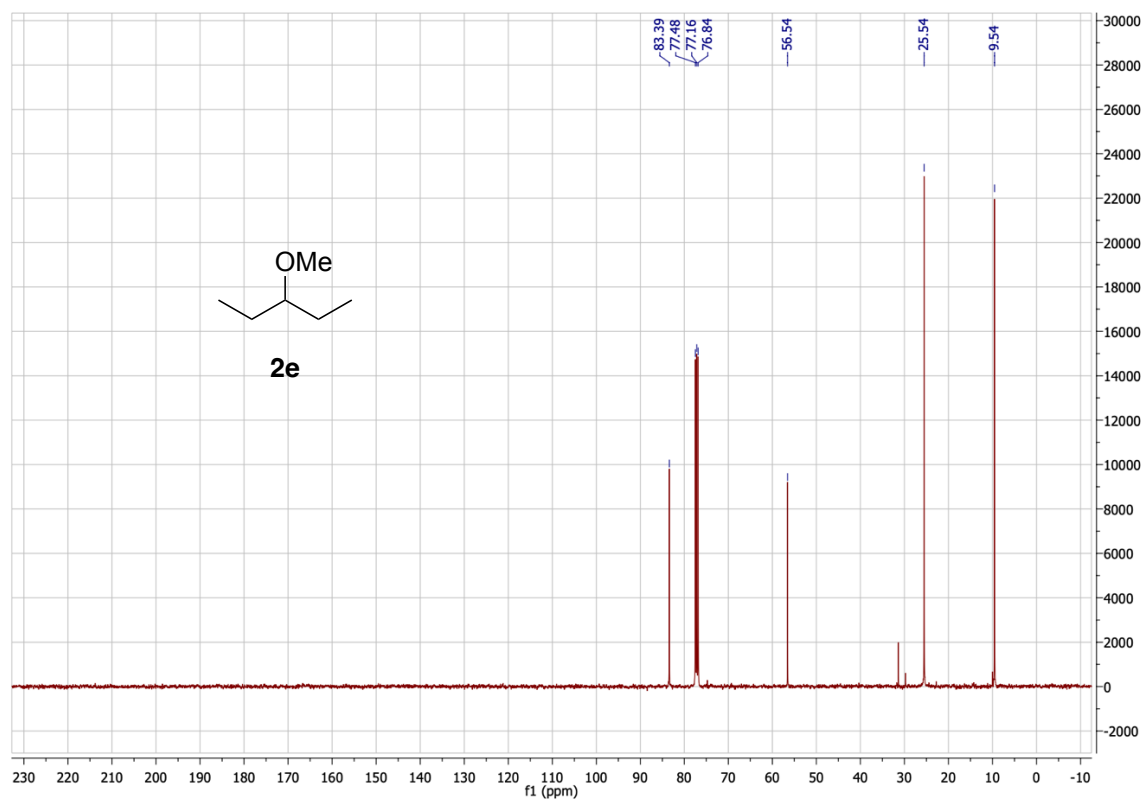

# $^1\text{H}$ and $^{13}\text{C}$ NMR of compound **2f**

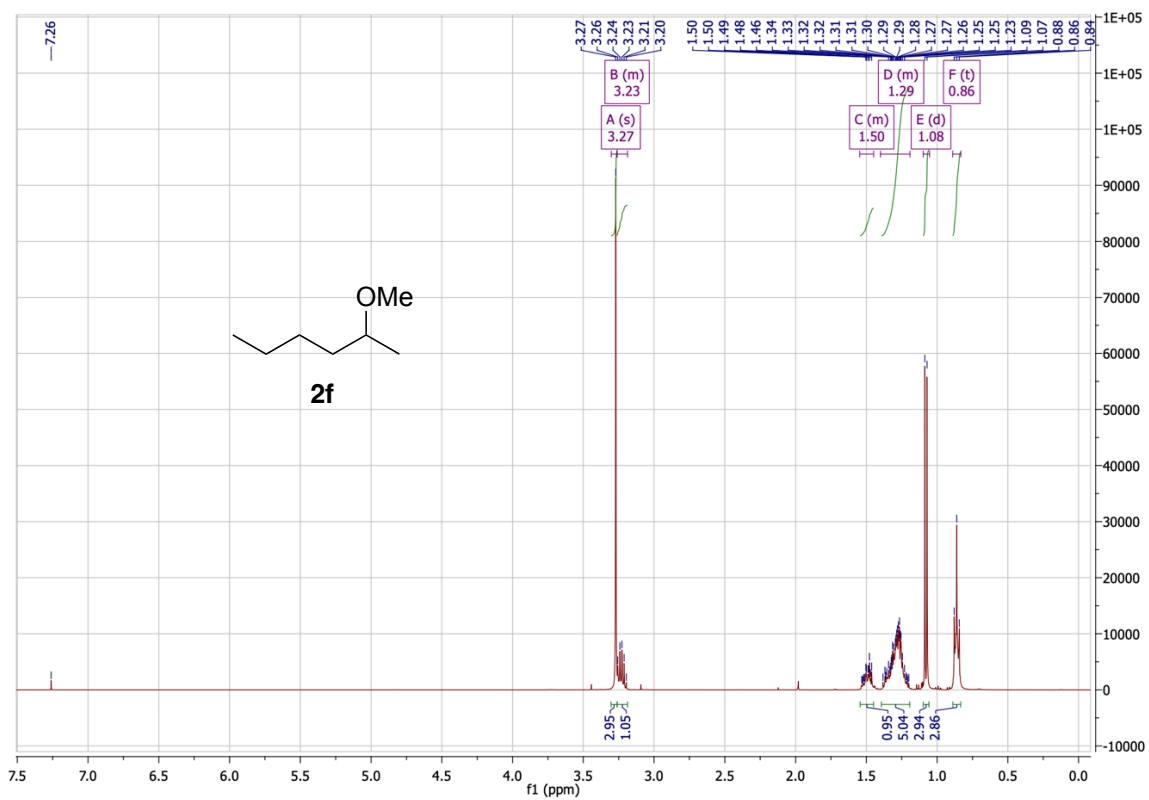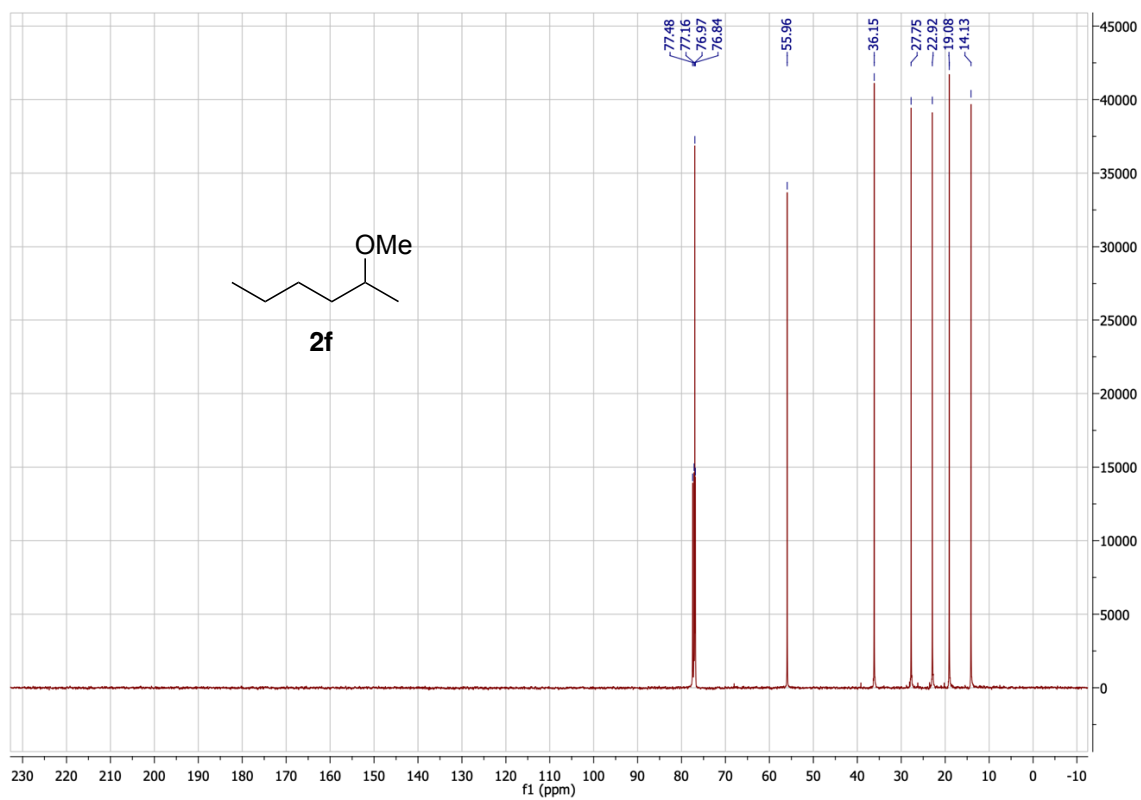

$^1\text{H}$  and  $^{13}\text{C}$  NMR of compound **2h**

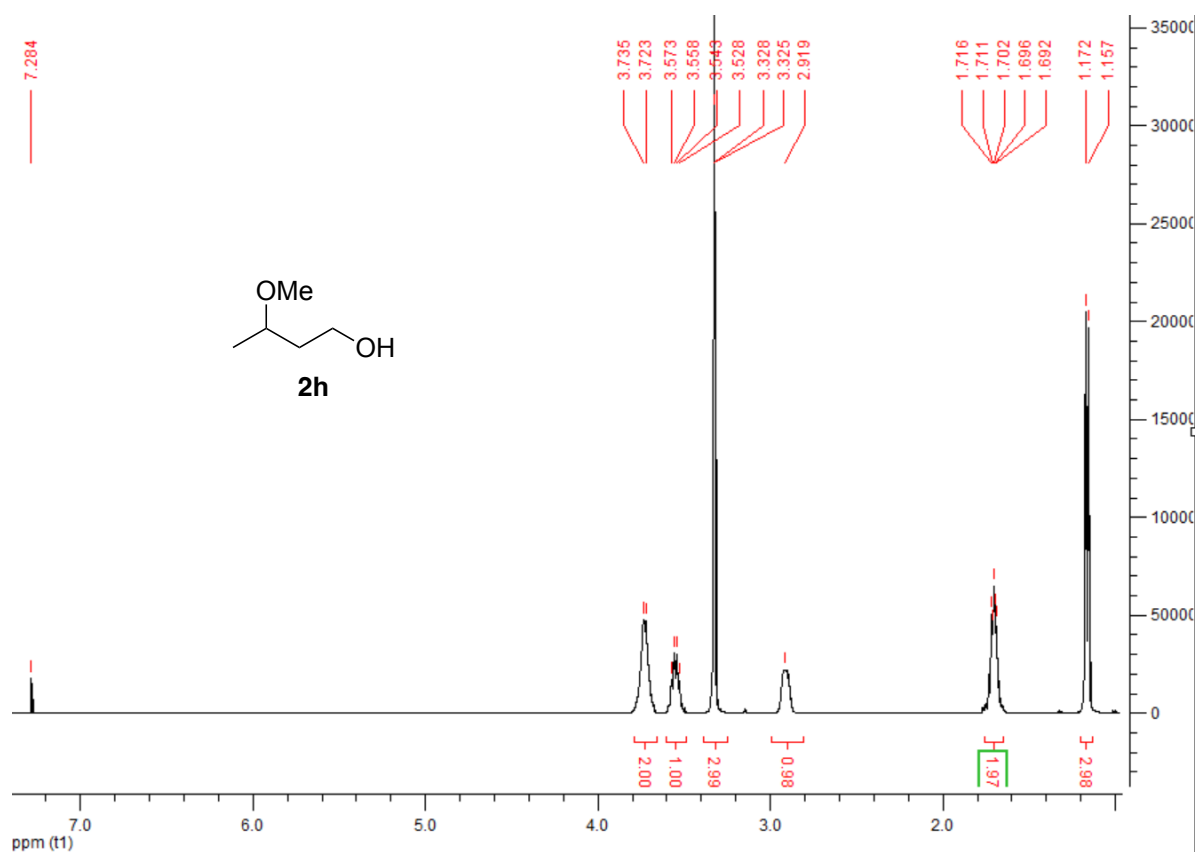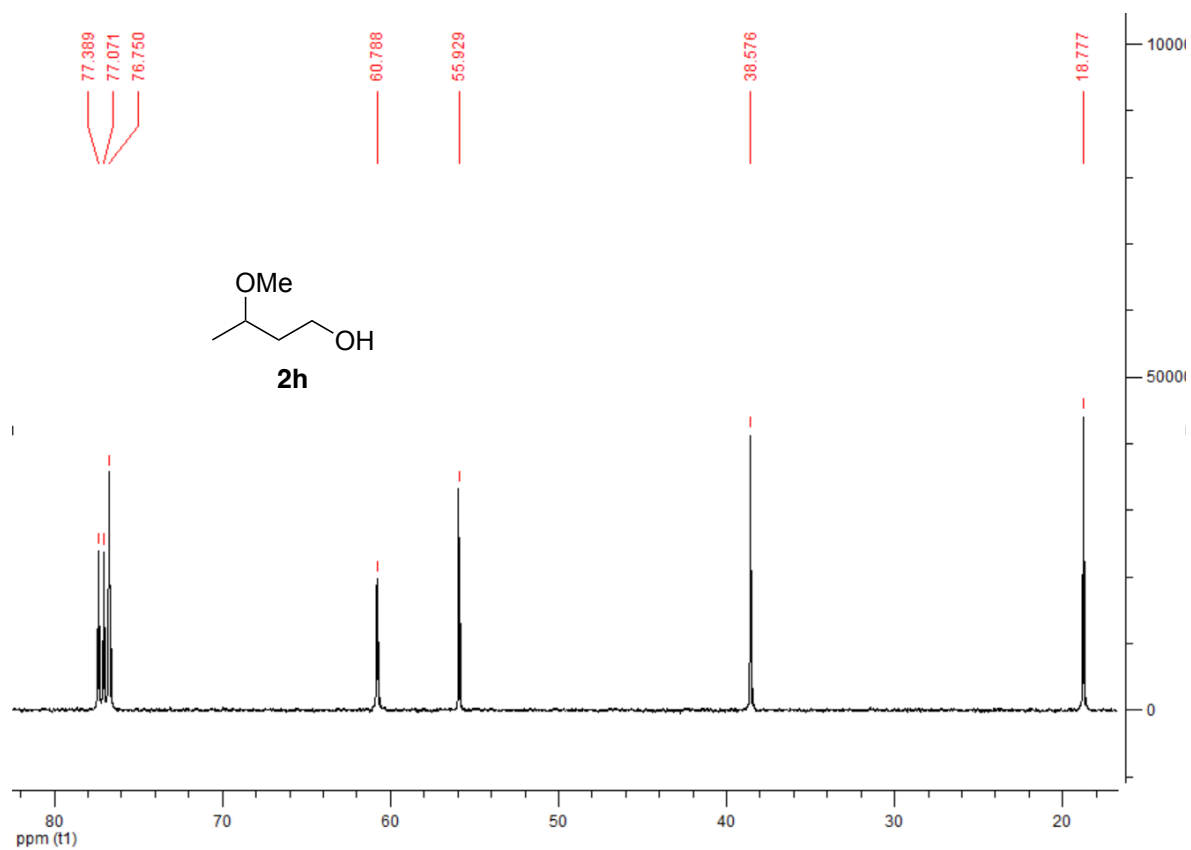

# $^1\text{H}$ and $^{13}\text{C}$ NMR of compound **2i**

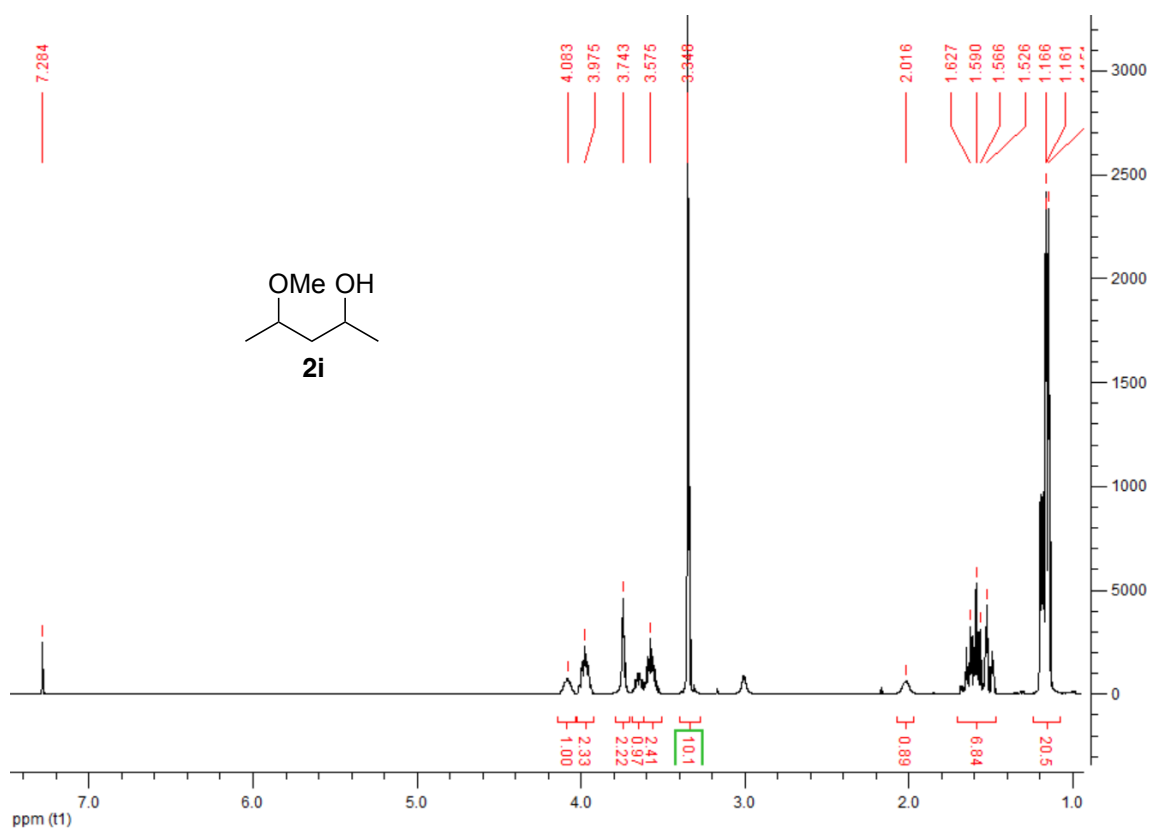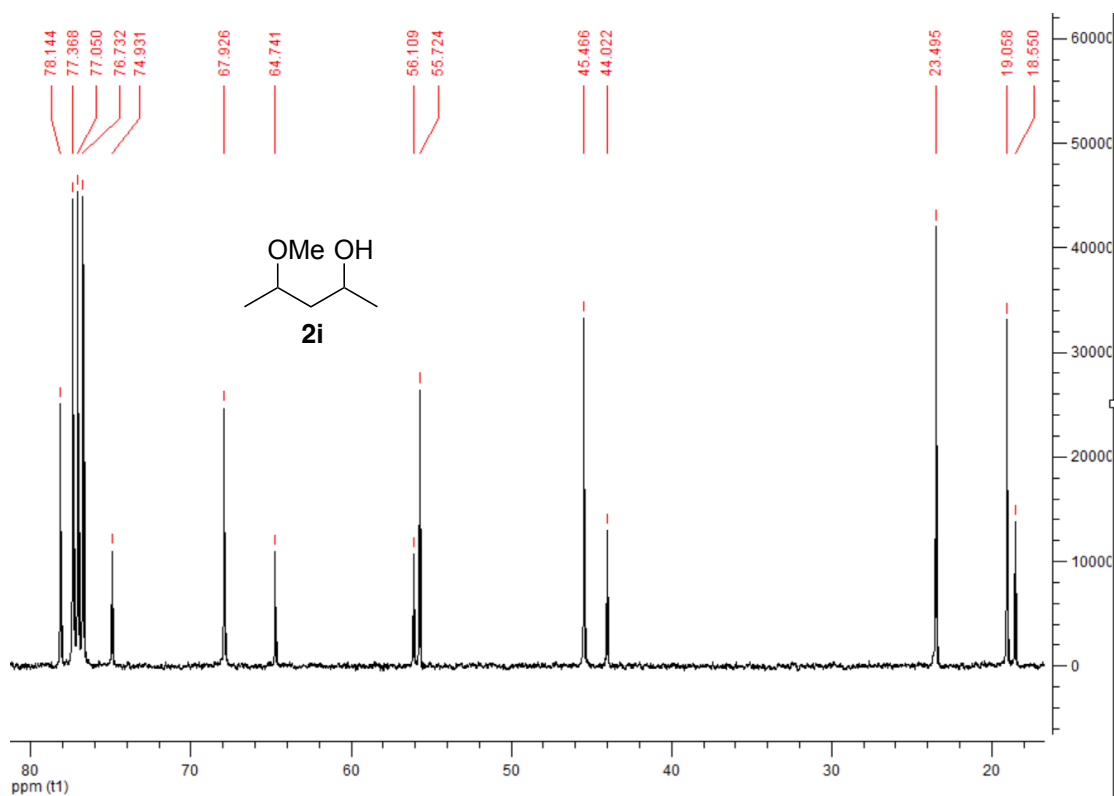



# $^1\text{H}$ and $^{13}\text{C}$ NMR of compound **2j**

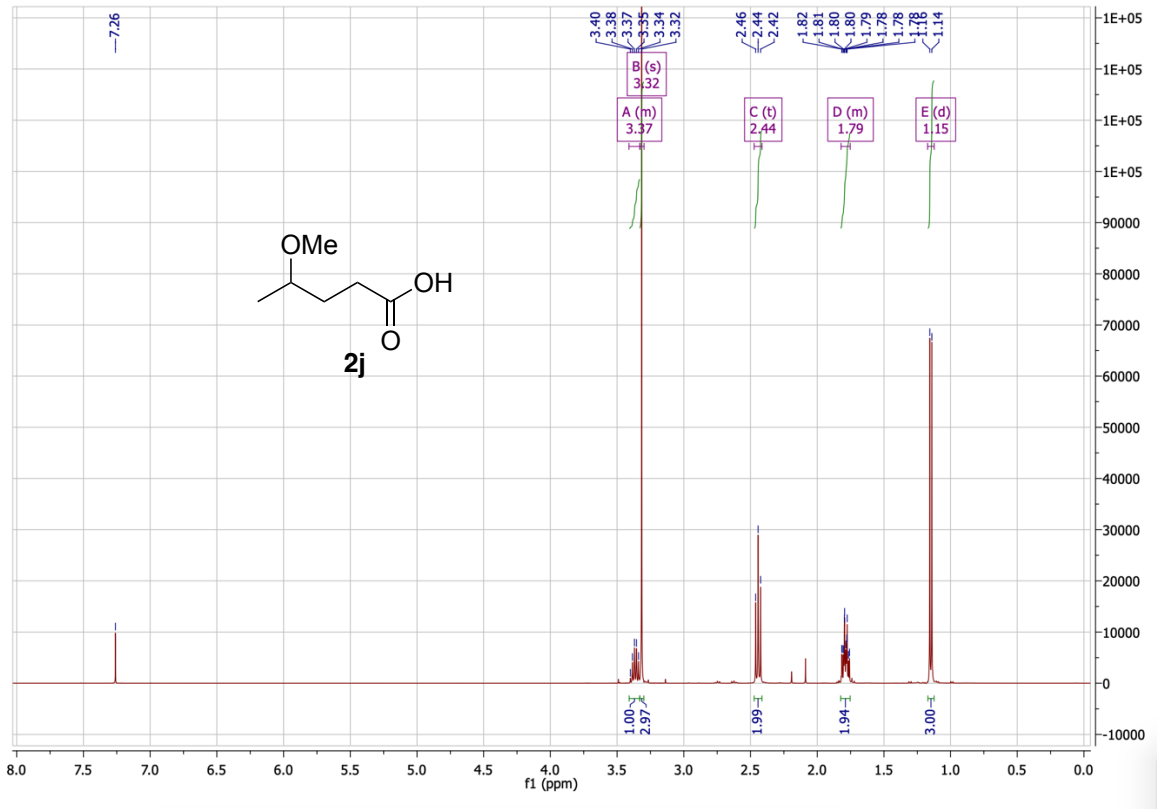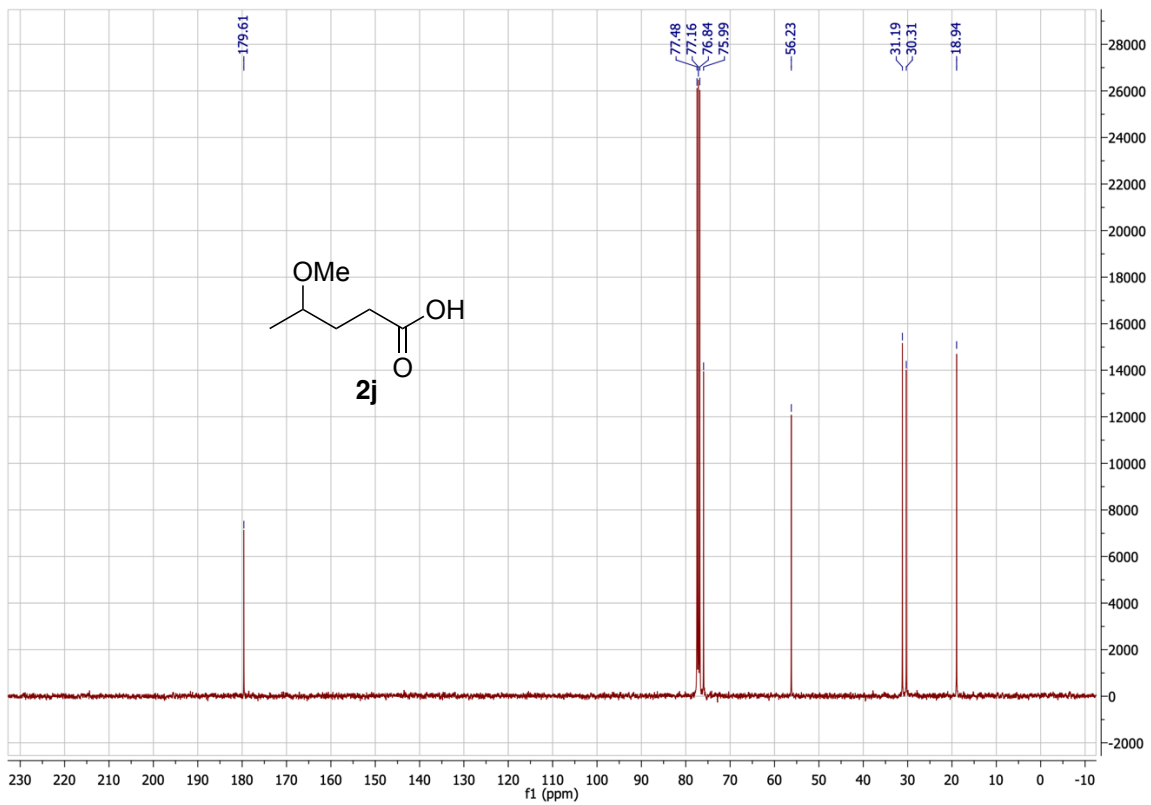

# $^1\text{H}$ and $^{13}\text{C}$ NMR of compound **2k**

k0706xh.7.fid  
xh-alk-65-sp

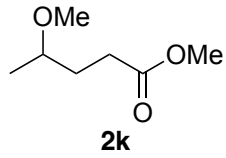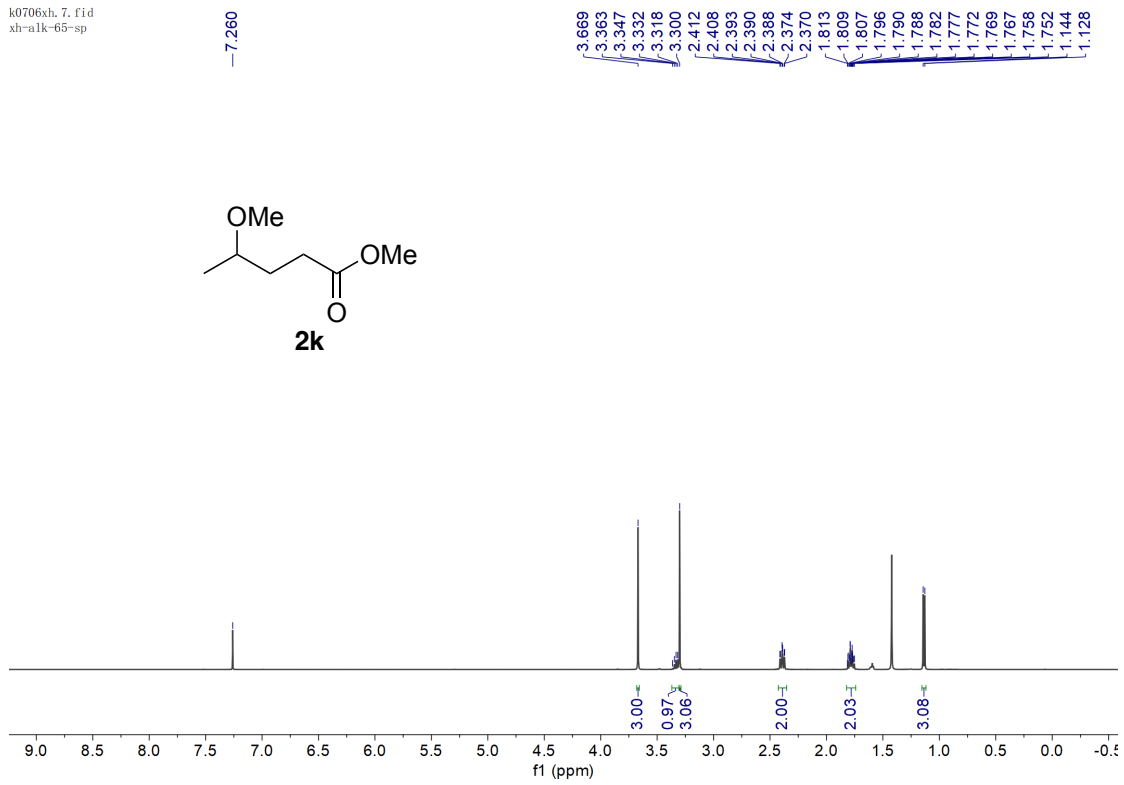

k0706xh.6.fid  
xh-alk-65-sp

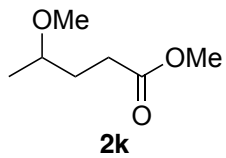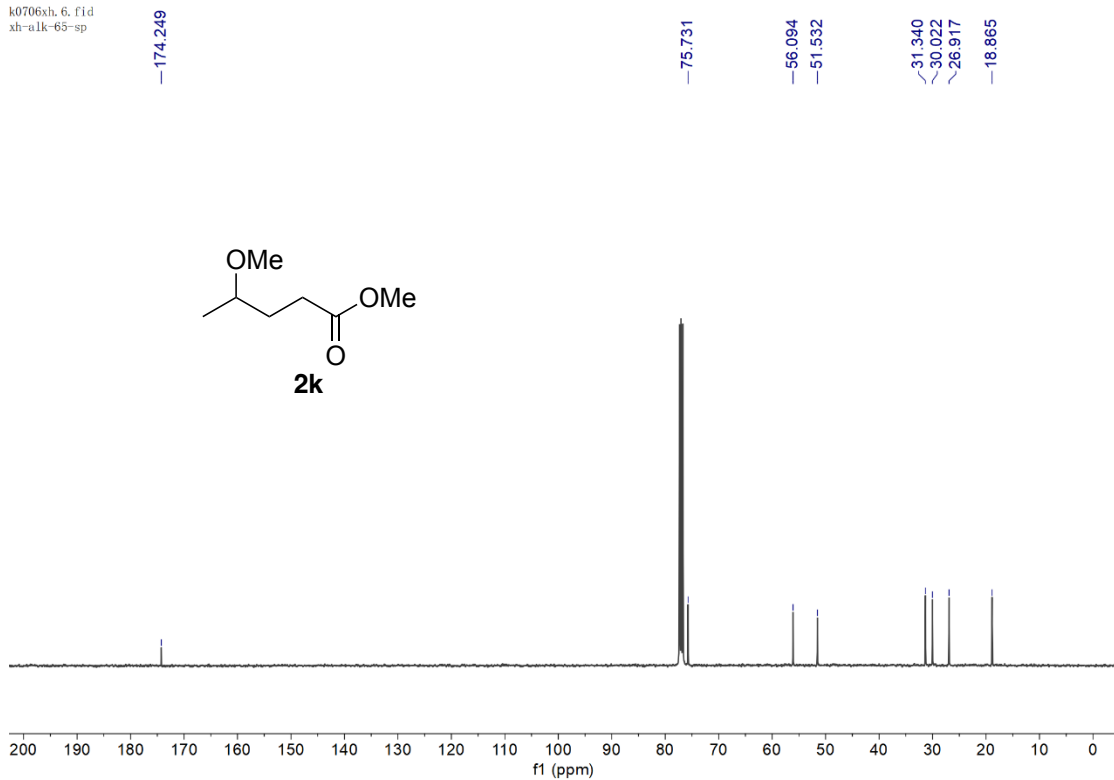

$^1\text{H}$  and  $^{13}\text{C}$  NMR of compound **5**

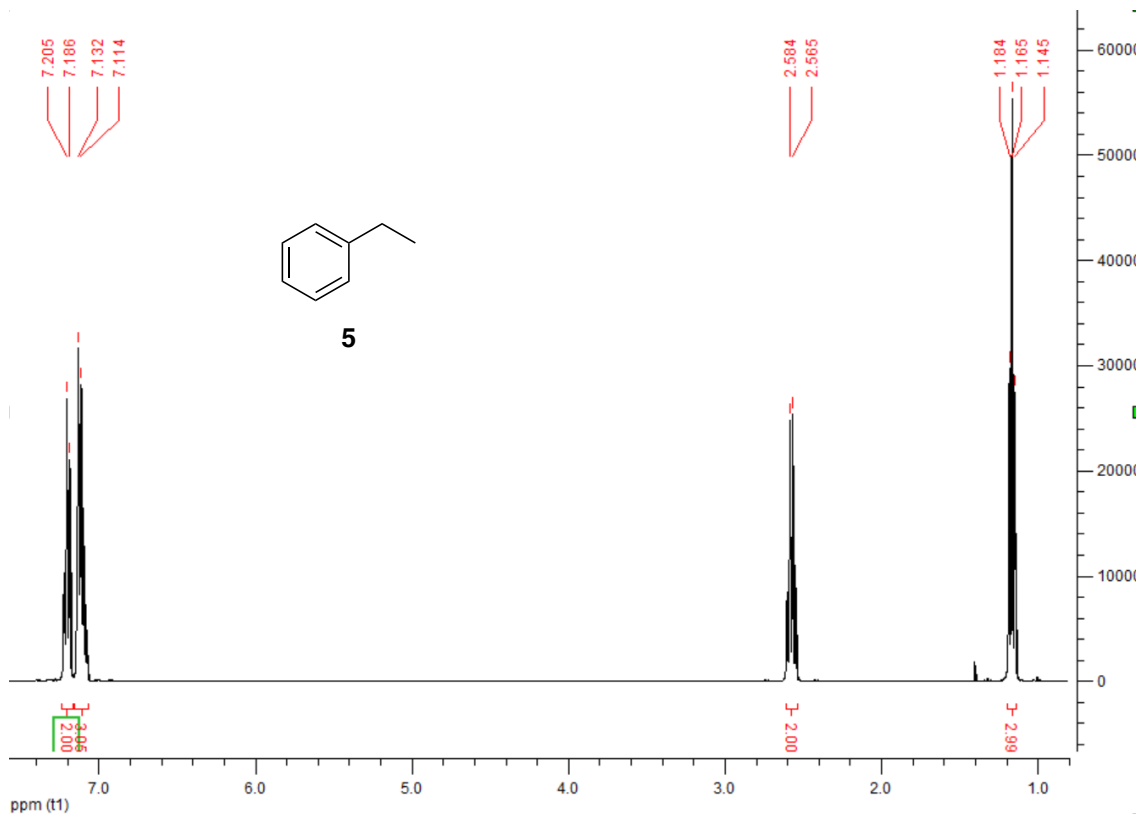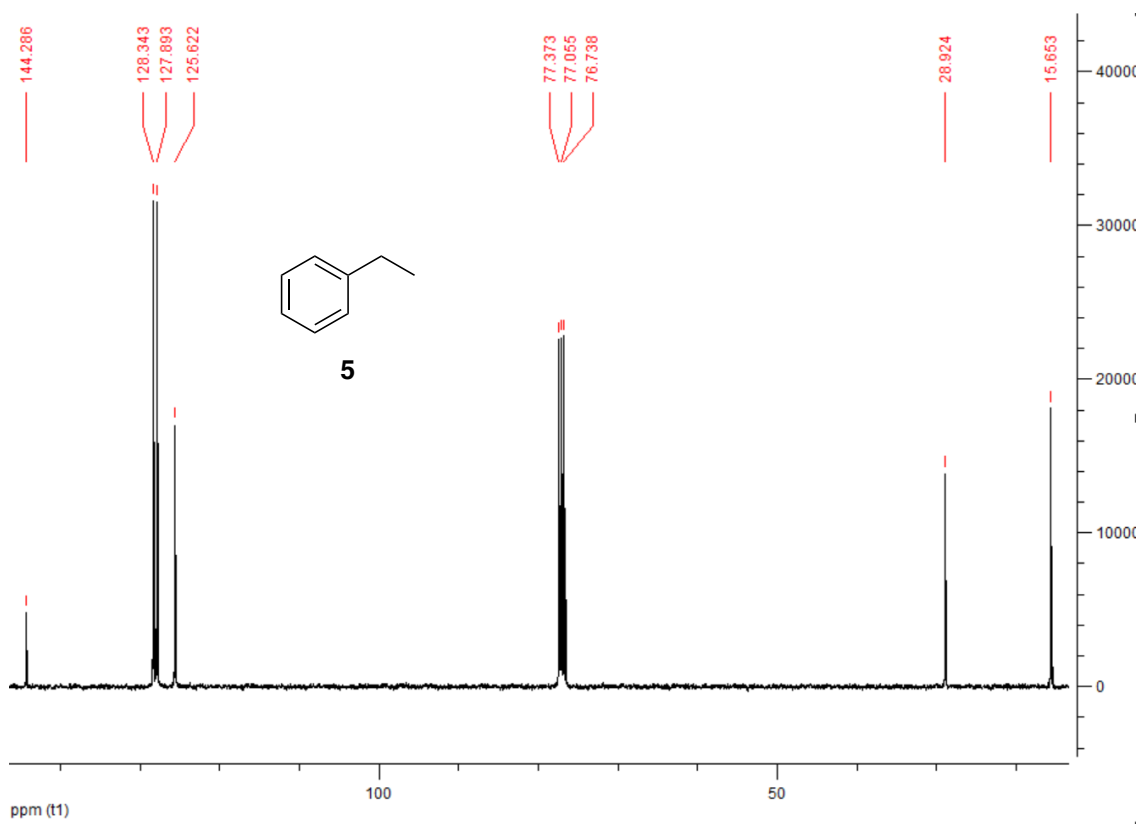

# $^1\text{H}$ and $^{13}\text{C}$ NMR of compound 6

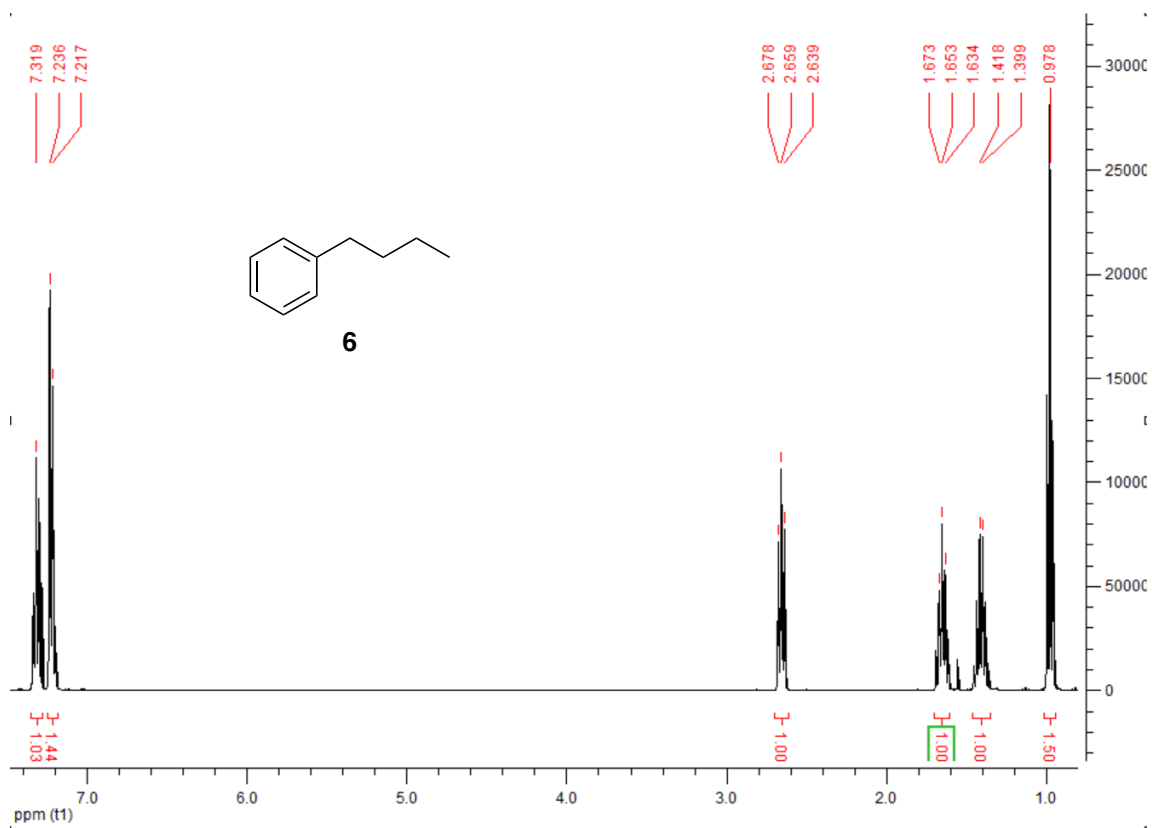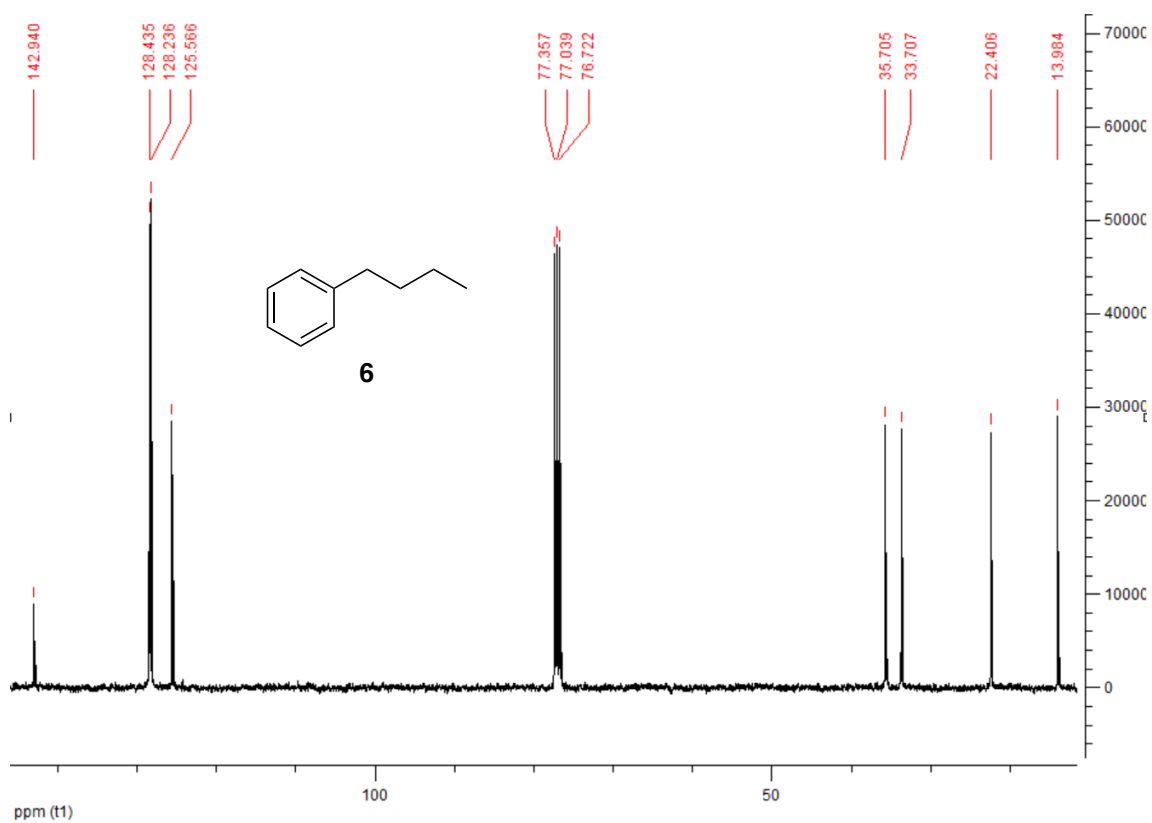

Supplement: d4nj03663h1.pdf [file d4nj03663h1.pdf]
